# Supplementary material
Source: publisher figshare collection journal article supplement (https://tandf.figshare.com/ndownloader/files/13563566)
Supplement: Supplementary file 1 [file 13563566]

**Supporting Information**

**Facile synthesis of novel benzothiazolylpyrazolyl anchored 3-thio/seleno/chloro-β-lactams: Synthetic intermediates for novel C-3 functionalized 3-sulfenyl/sulfonyl substituted monocyclic and spirocyclic β-lactams**

Jitender Bhalla, Shamsher S. Bari and Aman Bhalla*

| **Table of content** | | |
| --- | --- | --- |
| **Entry** | **Content** | **Page No.** |
| 1. | Spectral data for β-lactams **6b-k** | 2-6 |
| 2. | 1H and 13C NMR spectra of β-lactams **6a-k** | 7-17 |
| 3. | EI-MS spectra of β-lactams **6c** | 18 |

1. ***Spectral data for β-lactams 6b-k***

*trans-1-(4′-Methoxyphenyl)-4-[1-(6′-methoxybenzo[d]thiazol-2′-yl)-3-phenyl-1H-pyrazol-4-yl]-3-benzylthioazetidin-2-one (****6b****)*

Pale white solid; Yield 80%; mp 210–211 °C; FT-IR (neat) ν: 1746 (C=O) cm-1; 1H NMR spectrum (300 MHz, CDCl3), δ, ppm (*J*, Hz): 3.74 (3H, s, OCH3); 3.86 (4H, s, OCH3 & CH2S); 3.92 (1H, s, CH2S); 4.07 (1H, d, *J* = 2.1 Hz, C4-H); 4.66 (1H, d, *J* = 2.7 Hz, C3-H); 6.77-7.72 (17H, m, ArH); 8.26 (1H, s, =CH); 13C NMR spectrum (75 MHz, CDCl3), δ, ppm: 35.1, 54.5, 55.4, 55.8, 59.0, 104.6, 114.4, 115.5, 118.7, 119.6, 122.8, 126.5, 127.3, 128.4, 128.6, 128.8, 129.0, 129.2, 130.0, 130.8, 134.4, 137.2, 144.8, 153.3, 156.4, 157.5, 162.3; Elemental analysis: found (%): C, 67.27; H, 4.52; N, 9.08. C34H28N4O3S2 calculated (%): C, 67.53; H, 4.67; N, 9.26.

*trans-1-Benzyl-4-[1-(6′-methoxybenzo[d]thiazol-2′-yl)-3-phenyl-1H-pyrazol-4-yl]-3-phenylthioazetidin-2-one**(****6c****)*

White crystalline solid; Yield 82%; mp 155–156 °C; FT-IR (neat) ν: 1755 (C=O) cm-1; 1H NMR spectrum (300 MHz, CDCl3), δ, ppm (*J*, Hz): 3.69 (1H, d, *J* = 15 Hz, NCH2); 3.79 (3H, s, OCH3); 4.15 (1H, d, *J* = 2.4 Hz, C4-H); 4.32 (1H, d, *J* = 2.4 Hz, C3-H); 4.66 (1H, d, *J* = 15 Hz, NCH2); 6.49-7.72 (18H, m, ArH); 8.40 (1H, s, =CH); 13C NMR spectrum (75 MHz, CDCl3), δ, ppm: 44.2, 52.7, 55.8, 62.5, 104.6, 115.5, 119.0, 122.9, 126.4, 127.4, 127.8, 128.5, 128.6, 128.9, 129.0, 129.3, 129.6, 129.6, 130.8, 134.1, 134.2, 134.5, 135.0, 144.9, 154.1, 157.4, 157.6, 165.3; MS (ESI): *m/z* (%) = 574.9 (100) [M+H]+, 596.9 (9) [M+Na]+;Elemental analysis: found (%): C, 68.76; H, 4.41; N, 9.67. C33H26N4O2S2 calculated (%): C, 68.97; H, 4.56; N, 9.75.

*trans-1-Isobutyl-4-[1-(6'-methoxybenzo[d]thiazol-2'-yl)-3-phenyl-1H-pyrazol-4-yl)-3-phenylthio azetidin-2-one (****6d****)*

White fluffy solid; Yield 81%; mp 123–124 °C; FT-IR (neat) ν: 1755 (C=O) cm-1; 1H NMR spectrum (400 MHz, CDCl3), δ, ppm (*J*, Hz): 0.44 (3H, d, *J* = 6.6 Hz, CH3); 0.52 (3H, d, *J* = 6.6 Hz, CH3); 1.37 (1H, m, CH); 2.51 (1H, dd, NCH2); 3.23 (1H, dd, NCH2); 3.88 (3H, s, OCH3); 4.21 (1H, d, *J* = 1.7 Hz, C4-H); 4.56 (1H, d, *J* = 1.8 Hz, C3-H), 7.07-7.81 (13H, m, ArH); 8.45 (1H, s, =CH); 13C NMR spectrum (100 MHz, CDCl3), δ, ppm: 19.7, 20.0, 27.5, 54.2, 55.8, 62.4, 104.7, 115.6, 119.4, 123.0, 126.2, 128.7, 128.8, 129.0, 129.3, 129.4, 129.9, 131.0, 134.5, 135.0, 144.9, 154.0, 157.5, 157.6, 165.6; Elemental analysis: found (%): C, 65.05; H, 4.89; N, 9.42. C30H28N4O2S2 calculated (%): C, 66.64; H, 5.22; N, 10.36.

*trans-1-(4′-Methoxyphenyl)-4-[1-(6′-chlorobenzo[d]thiazol-2′-yl)-3-phenyl-1H-pyrazol-4-yl]-3-phenylthioazetidin-2-one**(****6e****)*

White fluffy solid; Yield 88%; mp 178–179 °C; FT-IR (neat) ν: 1757 (C=O) cm-1; 1H NMR spectrum (400 MHz, CDCl3), δ, ppm (*J*, Hz): 3.62 (3H, s, OCH3); 4.28 (1H, d, *J* = 2.2 Hz, C4-H); 4.84 (1H, d, *J* = 2.2 Hz, C3-H); 6.63-7.75 (17H, m, ArH); 8.30 (1H, s, =CH); 13C NMR spectrum (100 MHz, CDCl3), δ, ppm: 53.9, 55.4, 61.9, 114.4, 118.7, 120.1, 121.3, 123.1, 127.0, 127.5, 128.6, 128.8, 129.0, 129.3, 129.5, 129.7, 130.5, 130.7, 130.8, 133.6, 134.4, 149.3, 154.0, 156.5, 159.9, 162.4; Elemental analysis: found (%): C, 64.23; H, 3.82; N, 9.29. C32H23ClN4O2S2 calculated (%): C, 64.58; H, 3.90; N, 9.41.

*trans-1-(4′-Methoxyphenyl)-4-[1-(6′-methoxybenzo[d]thiazol-2′-yl)-3-p-tolyl-1H-pyrazol-4-yl]-3-phenylthioazetidin-2-one**(****6f****)*

Yellow crystalline solid; Yield 92%; mp 159–160 °C; FT-IR (neat) ν: 1742 (C=O) cm-1; 1H NMR spectrum (400 MHz, CDCl3), δ, ppm (*J*, Hz): 2.37 (3H, s, CH3); 3.60 (3H, s, OCH3); 3.76 (3H, s, OCH3); 4.26 (1H, d, *J* = 2.2 Hz, C4-H); 4.83 (1H, d, *J* = 2.2 Hz, C3-H); 6.61-7.63 (16H, m, ArH); 8.27 (1H, s, =CH); 13C NMR spectrum (100 MHz, CDCl3), δ, ppm: 21.4, 54.0, 55.4, 55.8, 61.9, 104.7, 114.4, 115.5, 118.7, 119.4, 122.9, 126.7, 128.1, 128.5, 128.6, 129.3, 129.6, 129.7, 130.7, 133.5, 134.5, 139.4, 144.9, 153.5, 156.4, 157.5, 162.5; Elemental analysis: found (%): C, 67.17; H, 4.56; N, 9.11. C34H28N4O3S2 calculated (%): C, 67.53; H, 4.67; N, 9.26.

*trans-1-(4′-Methoxyphenyl)-4-[1-(6′-methoxybenzo[d]thiazol-2′-yl)-3-phenyl-1H-pyrazol-4-yl]-3-phenylselenoazetidin-2-one (****6g****)*

White solid; Yield 67%; mp 160–162 °C; FT-IR (neat) ν: 1754 (C=O) cm-1; 1H NMR spectrum (400 MHz, CDCl3), δ, ppm (*J*, Hz): 3.56 (3H, s, OCH3); 3.72 (3H, s, OCH3); 4.24 (1H, d, *J* = 2.0 Hz, C4-H); 4.72 (1H, d, *J* = 1.9 Hz, C3-H); 6.55-7.75 (17H, m, ArH); 8.25 (1H, s, =CH); 13C NMR spectrum (100 MHz, CDCl3), δ, ppm: 53.5, 54.0, 55.1, 55.6, 104.5, 114.4, 115.5, 118.4, 119.9, 123.1, 125.3, 126.6, 128.7, 128.8, 129.0, 129.2, 129.3, 130.0, 131.2, 134.6, 136.1, 145.1, 153.2, 156.3, 157.2, 157.6, 162.6; Elemental analysis: found (%): C, 61.92; H, 3.97; N, 8.62. C33H26N4O3SSe calculated (%): C, 62.16; H, 4.11; N, 8.79.

*trans-1-Benzyl-4-[1-(6′-methoxybenzo[d]thiazol-2′-yl)-3-phenyl-1H-pyrazol-4-yl]-3-phenylselenoazetidin-2-one (****6h****)*

Yellow crystalline solid; Yield 80%; mp 142–145 °C; FT-IR (neat) ν: 1754 (C=O) cm-1; 1H NMR spectrum (300 MHz, CDCl3), δ, ppm (*J*, Hz): 3.78 (1H, d, *J* = 15 Hz, NCH2); 3.89 (3H, s, OCH3); 4.28 (1H, d, *J* = 1.5 Hz, C4-H); 4.40 (1H, d, *J* = 2.1 Hz, C3-H); 4.67 (1H, d, *J* = 15 Hz, NCH2); 6.55-7.81 (18H, m, ArH); 8.47 (1H, s, =CH); 13C NMR spectrum (75 MHz, CDCl3), δ, ppm: 44.4, 53.1, 54.1, 55.9, 104.8, 115.8, 123.2, 126.6, 127.6, 128.1, 128.7, 128.8, 129.2, 129.4, 129.6, 137.1, 137.2, 145.2, 154.4, 157.8, 157.9, 166.1; Elemental analysis: found (%): C, 63.29; H, 4.08; N, 8.86. C33H26N4O2SSe calculated (%): C, 63.76; H, 4.22; N, 9.01.

*trans-1-Isobutyl-4-[1-(6'-methoxybenzo[d]thiazol-2'-yl)-3-phenyl-1H-pyrazol-4-yl)-3-phenylselenoazetidin-2-one (****6i****)*

White fluffy solid; Yield 64%; mp 106–107 °C; FT-IR (neat) ν: 1750 (C=O) cm-1; 1H NMR spectrum (400 MHz, CDCl3), δ, ppm (*J*, Hz): 0.34 (3H, d, *J* = 6.6 Hz, CH3); 0.40 (3H, d, *J* = 6.6 Hz, CH3); 1.21 (1H, m, CH); 2.39 (1H, dd, NCH2); 3.11 (1H, dd, NCH2); 3.80 (3H, s, OCH3); 4.18 (1H, d, *J* = 1.4 Hz, C4-H); 4.48 (1H, d, *J* = 1.6 Hz, C3-H), 6.99-7.74 (13H, m, ArH); 8.38 (1H, s, =CH); 13C NMR spectrum (100 MHz, CDCl3), δ, ppm: 19.8, 20.1, 48.1, 54.1, 54.5, 55.8, 104.7, 115.6, 119.6, 123.0, 124.7, 126.2, 128.7, 128.8, 129.2, 129.5, 131.0, 134.5, 136.9, 145.0, 154.0, 157.5, 157.6, 166.0; Elemental analysis: found (%): C, 60.89; H, 4.62; N, 9.38. C30H28N4O2SSe calculated (%): C, 61.32; H, 4.80; N, 9.53.

*trans-1-Benzyl-4-[1-(6′-methoxybenzo[d]thiazol-2′-yl)-3-phenyl-1H-pyrazol-4-yl]-3-chloroazetidin-2-one (****6j****)*

White crystalline solid; Yield 84%; mp 115–116 °C; FT-IR (neat) ν: 1757 (C=O) cm-1; 1H NMR spectrum (300 MHz, CDCl3), δ, ppm (*J*, Hz): 3.88 (3H, s, OCH3); 3.94 (1H, d, *J* = 15 Hz, NCH2); 4.56 (1H, d, *J* = 1.8 Hz, C4-H); 4.67 (1H, d, *J* = 1.8 Hz, C3-H); 4.83 (1H, d, *J* = 15 Hz, NCH2); 7.04-7.76 (12H, m, ArH); 8.42 (1H, s, =CH); 13C NMR spectrum (75 MHz, CDCl3), δ, ppm: 44.7, 55.7, 56.9, 63.4, 104.6, 115.6, 117.9, 122.9, 126.6, 127.6, 128.1, 128.7, 128.9, 129.1, 130.5, 134.0, 134.4, 144.8, 153.7, 157.2, 157.6, 163.1; Elemental analysis: found (%): C, 64.39; H, 4.11; N, 11.03. C27H21ClN4O2S calculated (%): C, 64.73; H, 4.22; N, 11.18.

*trans-1-Isobutyl-4-[1-(6'-methoxybenzo[d]thiazol-2'-yl)-3-phenyl-1H-pyrazol-4-yl)-3-chloroazetidin-2-one (****6k****)*

White crystalline solid; Yield 87%; mp 134–135 °C; FT-IR (neat) ν: 1768 (C=O) cm-1; 1H NMR spectrum (400 MHz, CDCl3), δ, ppm (*J*, Hz): 0.74 (3H, d, *J* = 6.7 Hz, CH3); 0.81 (3H, d, *J* = 6.6 Hz, CH3); 1.68 (1H, m, CH); 2.64 (1H, dd, NCH2); 3.27 (1H, dd, NCH2); 3.78 (3H, s, OCH3); 4.57 (1H, d, *J* = 0.88 Hz, C4-H); 4.67 (1H, d, *J* = 0.88 Hz, C3-H), 6.98-7.70 (13H, m, ArH); 8.38 (1H, s, =CH); 13C NMR spectrum (100 MHz, CDCl3), δ, ppm: 19.9, 20.1, 27.3, 48.1, 55.8, 58.0, 63.3, 104.7, 115.7, 118.2, 123.0, 126.4, 128.3, 129.0, 129.3, 130.7, 134.5, 144.9, 153.8, 157.4, 157.7, 163.4; Elemental analysis: found (%): C, 61.34; H, 4.79; N, 11.81. C24H23ClN4O2S calculated (%): C, 61.73; H, 4.96; N, 12.00.

1. **1H and 13C NMR spectra of β-lactams 6a-k**

**Figure S1**: 1H and 13C NMR of β-lactam **6a** in CDCl3


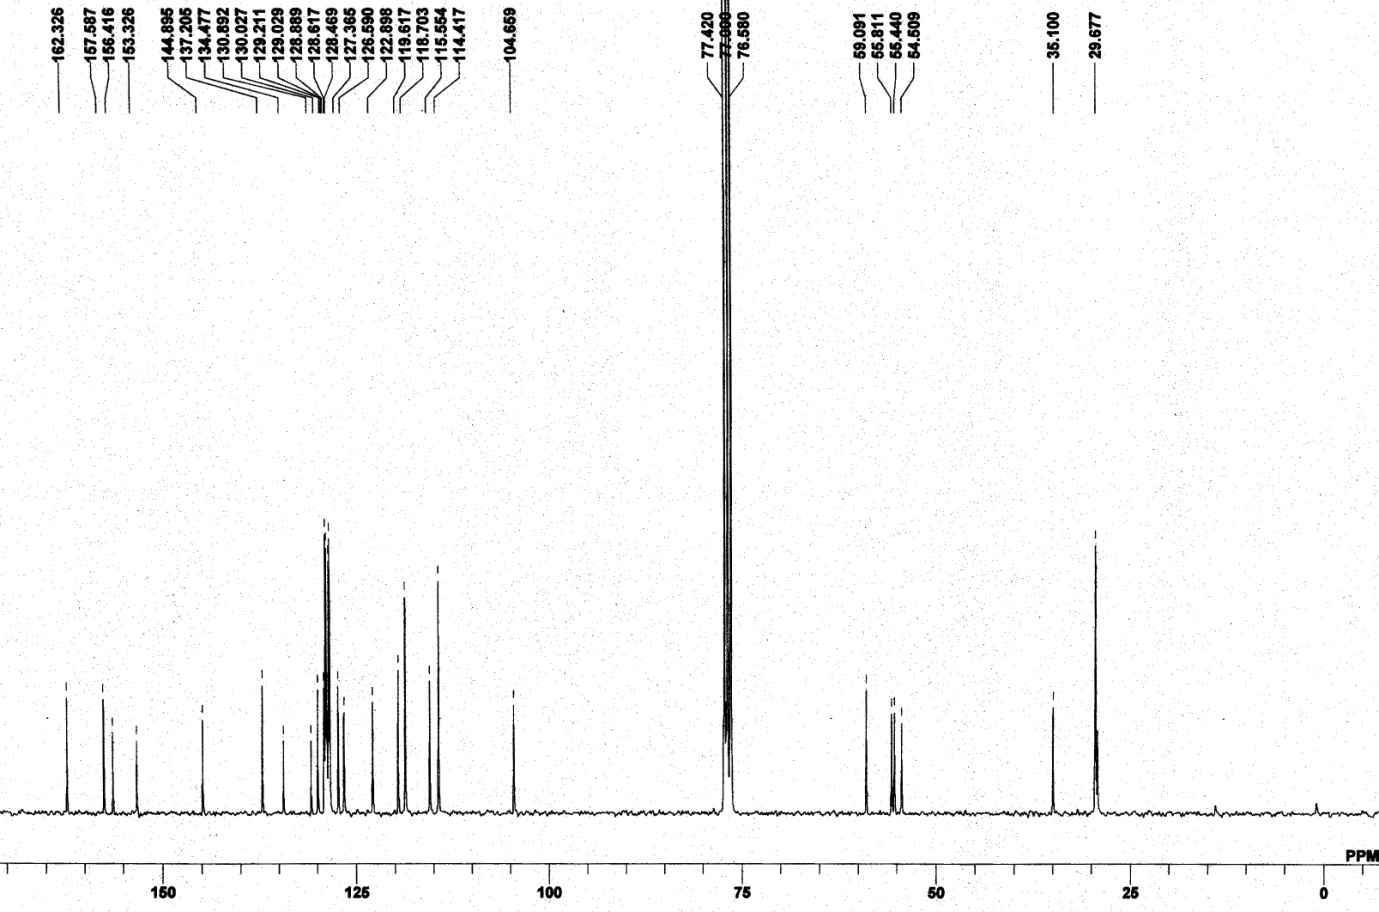


**Figure S2**: 1H and 13C NMR of β-lactam **6b** in CDCl3

**Figure S3**: 1H and 13C NMR of β-lactam **6c** in CDCl3

**Figure S4**: 1H and 13C NMR of β-lactam **6d** in CDCl3

**Figure S5**: 1H and 13C NMR of β-lactam **6e** in CDCl3

**Figure S6**: 1H and 13C NMR of β-lactam **6f** in CDCl3

**Figure S7**: 1H and 13C NMR of β-lactam **6g** in CDCl3

**Figure S8**: 1H and 13C NMR of β-lactam **6h** in CDCl3

**Figure S9**: 1H and 13C NMR of β-lactam **6i** in CDCl3

**Figure S10**: 1H and 13C NMR of β-lactam **6j** in CDCl3

**Figure S11**: 1H and 13C NMR of β-lactam **6k** in CDCl3

1. **EI-MS spectra of β-lactam 6c**

**Figure S12**: EI-MS spectra of β-lactam **6c**
